# Supplementary material
Source: PubMed Central journal article supplement (PMC11027669)
Supplement: 262_2020_2568_MOESM8_ESM.pdf [file 262_2020_2568_MOESM8_ESM.pdf]

## **Supplementary files**

### **Media used for experiments**

#### Culture medium (CM)

Medium containing RPMI 1640 (Gibco 72400-021), penicillin/streptomycin (Gibco 15140-122), Fungizone (E.R. Squibb & Sons Ltd 49182), 10% heat-inactivated human AB serum (Sigma-Aldrich H4522-100ML), and 6,000 IU/mL IL-2 (Proleukin ®, Novartis 004184).

#### Tumor medium (R10)

Medium containing RPMI 1640, penicillin/streptomycin, 10% fetal bovine serum (Gibco 10270-106), and Solu-cortef (Pfizer H02AB09).

#### Enzyme digest medium

Medium containing RPMI 1640, penicillin/streptomycin, 1mg/mL collagenase (Sigma-Aldrich), and 0.0125 mg/mL dornase alpha (Pulmozyme, Roche 148213).

## Antibodies used for flow cytometry

| <b>Antibody and fluorochrome</b> | <b>Provider</b> | <b>Catalog no.</b> |
|----------------------------------|-----------------|--------------------|
| 7AAD PerCP                       | BD Biosciences  | 559925             |
| BTLA PE                          | BD Biosciences  | 558485             |
| CCR7 FITC                        | R&D systems     | FAB197F            |
| CCR7 PE-Cy7                      | BD Biosciences  | 557648             |
| CD127 Pe-Cy7                     | BD Biosciences  | 560822             |
| CD137 APC                        | Biolegend       | 309810             |
| CD137 PE                         | BD Biosciences  | 555956             |
| CD16 FITC                        | DAKO            | F7011              |
| CD25 BV421                       | BD Biosciences  | 564033             |
| CD27 PE                          | BD Biosciences  | 340425             |
| CD28 APC                         | BD Biosciences  | 559770             |
| CD3 AmCyan                       | BD Biosciences  | 339186             |
| CD3 BV510                        | BD Biosciences  | 740202             |
| CD3 FITC                         | BD Biosciences  | 345763             |
| CD4 APC                          | BD Biosciences  | 345771             |
| CD4 BV510                        | BD Biosciences  | 562970             |
| CD4 PerCP                        | BD Biosciences  | 345770             |
| CD45RA APC                       | BD Biosciences  | 550855             |
| CD45RA FITC                      | BD Biosciences  | 335039             |
| CD45RO PE                        | BD Biosciences  | 347967             |
| CD56 PE                          | BD Biosciences  | 345810             |
| CD56 PE Cy7                      | BD Biosciences  | 557747             |
| CD57 FITC                        | BD Biosciences  | 555619             |
| CD62L APC                        | BD Biosciences  | 559772             |
| CD62L APC Cy7                    | BioLegend       | 304814             |
| CD69 Pe-Cy7                      | BD Biosciences  | 557745             |
| CD8 BV421                        | BD Biosciences  | 562428             |
| CD8 PB                           | DAKO            | PB984              |
| CD8 PerCP                        | BD Biosciences  | 345774             |
| FoxP3 PE                         | eBioscience     | 12-4776-42         |
| Gamma-Delta TCR PE               | Biolegend       | 331212             |
| LAG3 FITC                        | LS Biosciences  | LS-B2237           |
| PD1 Pe-Cy7                       | BD Biosciences  | 561272             |
| TIM3 APC                         | eBioscience     | 17-3109-42         |

## Supplementary figure legend

### Figure S1

Bar plot showing median expansion time of Young TILs for each sarcoma subtype. Each open circle represents one patient sample.

### Figure S2

Scatter plot showing percentage of  $\alpha\beta$  T cells,  $\gamma\delta$  T cells, and NK cells in the Young TIL and REP TIL populations, and scatter plot showing percentage of naïve T cells (CD3+CD45RO-CCR7+), central memory T cells (CD3+CD45RO+CCR7+), effector memory T cells (CD3+CD45RO+CCR7-), and effector T cells (CD3+CD45RO-CCR7-) in the Young TIL and REP TIL populations.

### Figure S3

Microscope images of established tumor cell lines. The described malignant characteristics were also present in the tumor at the time of surgery. **A)** Photograph showing many vacuolated “lipoblast-like/lipoblast” pleomorphic cells in a sample from a pleomorphic liposarcoma (SAR-30). **B)** Photograph showing pleomorphic cell population with many mitotic figures in a sample from an inflammatory myofibroblastic sarcoma (SAR-26). **C)** Photograph showing mononuclear and multinuclear giant cells in a sample from an undifferentiated pleomorphic sarcoma (SAR-14).

### Figure S4

Additional phenotypic data of TIL stimulated with CD3, 4-1BB or a combination of these. **A)** Scatter plot showing percentage of  $\gamma\delta$  T cells in the Young TIL populations for the four analyte groups. **B)** Scatter plot showing percentage of  $\alpha\beta$  T cells in the REP TIL populations for the four analyte groups. **C)** Bar plots showing median percentage of CD4<sup>+</sup> and CD8<sup>+</sup> T cells expressing CD27, CD28, 4-1BB, PD-1, LAG3, BTLA, and TIM-3 in REP TILs stimulated with only IL-2 (white), IL-2+anti-CD3 (blue), IL-2+4-1BB (black), and IL-2+anti-CD3+4-1BB (red). Each dot represents one patient sample. **D-G)** Bar plots showing median NPX values as measures of CCL4, CD70, CSF-1, and CD83 concentrations in the supernatants on day 5 of expansion. Each open circle represents one patient sample.

**Figure S5**

Graph showing an example of cytolysis from a TIL sample with high reactivity (SAR-26) as a function of time using xCelligence. In this sample we tested if PD-1 blocking, LAG3 blocking, or 4-1BB stimulation had any effect on cytolysis. The arrow indicates the time point of addition of the REP TILs.

**Figure S6**

FACS plots showing gating strategies for TIL phenotype analyses.
